# Supplementary material for: Inhibiting ATP6V0D2 Aggravates Liver Ischemia-Reperfusion Injury by Promoting NLRP3 Activation via Impairing Autophagic Flux Independent of Notch1/Hes1
Source: Hindawi journal article supplement (doi:10.1155/2021/6670495), 2021-03-29
Supplement: f1 [file 6670495.f1.pdf]

Supplementary Table 1: Primer sequences used for Real-Time Quantitative PCR

| Gene          | Forward                      | Reverse                       |
|---------------|------------------------------|-------------------------------|
| NLRP3         | 5'-CTGGCTGCGGATGGAATTTG-3'   | 5'-CTGGTCCTTTCCTCACGGTC-3'    |
| IL1 $\beta$   | 5'-TGTAATGAAAGACGGCACACC-3'  | 5'-TCTTCTTGGGTATTGCTTGG-3'    |
| IL10          | 5'-CGACTCCTTAATGCAGGACT-3'   | 5'-TTGATTTCTGGGCCATGC-3'      |
| Arg1          | 5'-GGAAAGCCAATGAAGAGCTG-3'   | 5'-GATGCTTCCAAGTCCAGAC-3'     |
| MCP1          | 5'-CATCCACGTGTTGGCTCA-3'     | 5'-GATCATCTTGCTGGTGAATGAGT-3' |
| ATP6V0D2      | 5'-TGCGGCAGGCTCTATCCAGAGG-3' | 5'-CCACTGCCACCGACAGCGTC-3'    |
| TNF- $\alpha$ | 5'-GCCTCTTCTCATTCTGCTTGT-3'  | 5'-GATGATCTGAGTGTGAGGGTCTG-3' |
